# Supplementary material for: Study of repertoire use reveals unexpected context-dependent vocalizations in bottlenose dolphins (Tursiops truncatus)
Source: Springer Nature journal article supplement (doi:10.1007/s00114-023-01884-3), 2023-12-01
Supplement: MOESM1 [file 114_2023_1884_MOESM1_ESM.pdf]

**Article title: Study of repertoire use reveals unexpected context-dependent vocalizations in bottlenose dolphins (*Tursiops truncatus*)**

**Journal: The Science of Nature (Naturwissenschaften)**

**Authors :** Alessandro Gallo <sup>1,2,3\*</sup>; Alice De Moura Lima <sup>1,3\*</sup>; Martin Böye <sup>3</sup>; Martine Hausberger <sup>2,4\$</sup>;  
Alban Lemasson <sup>1\$</sup>

\* co-first authors

\$ co-last authors

<sup>1</sup> Université de Rennes, Université de Caen-Normandie, UMR 6552, Laboratoire d’Ethologie animale et humaine, France

<sup>2</sup> Université de Paris Cité, UMR 8002, Integrative Center for Neuroscience and Cognition, France

<sup>3</sup> Centre de Recherche et d’Études pour l’Animal Sauvage (CREAS), Port Saint Père, France

<sup>4</sup> Honorary Professor, Rhodes University, Department of Zoology and Entomology, Grahamstown, South Africa

**Corresponding author: [Alessandro.gallo@univ-rennes1.fr](mailto:Alessandro.gallo@univ-rennes1.fr)**

**Fig.S1** Aerial view of the facility in which our study group was housed. The observatory pool was the P<sub>4</sub> (marked in red in the figure)

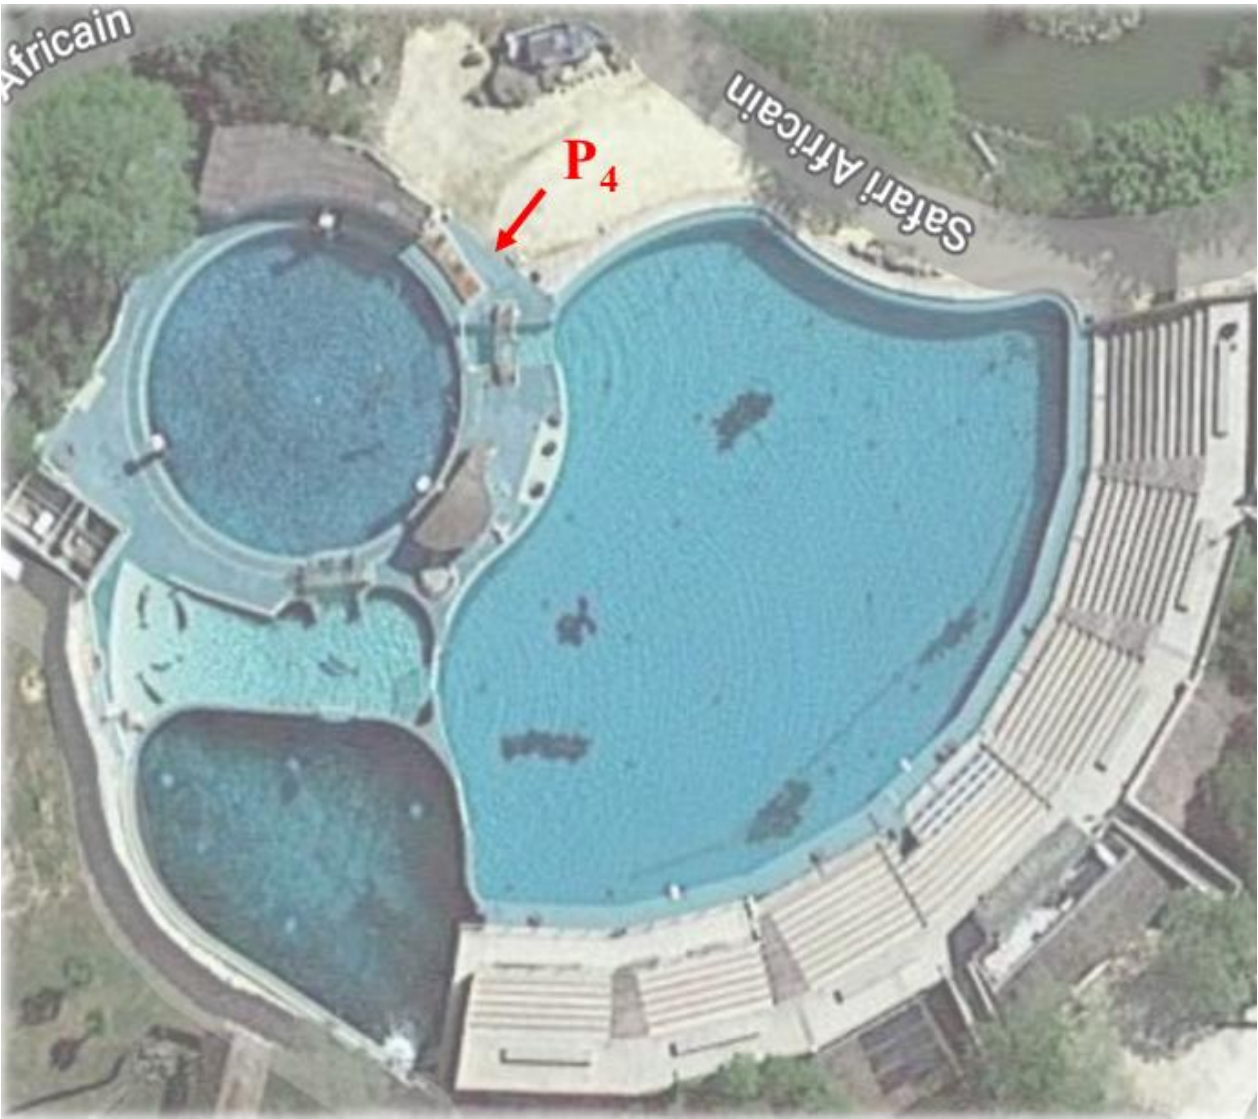

**Table S1** Description of the six behavioral categories considered during the acoustic production

| <b>Behavioural context</b> | <b>Description</b>                                                                                                                                                                                                                                                                                                                   |
|----------------------------|--------------------------------------------------------------------------------------------------------------------------------------------------------------------------------------------------------------------------------------------------------------------------------------------------------------------------------------|
| <b>Affiliative</b>         | Include many tactile behavioural events such as rubbing, swim contact, petting, and synchronous movements.                                                                                                                                                                                                                           |
| <b>Agonistic</b>           | One dolphin starts a series of aggressive displays towards one or several other individuals by performing: chasing, mouth-biting, hitting, threatening, or head butting. The interaction ends with the attack and/or the flee.                                                                                                       |
| <b>Sexual</b>              | At least two individuals separating by one body-length interacting in series of both rough and gentle behaviours, including: mate and attempts to mate, rubbing, genital inspection, chasing, biting, jaw clapping, erection and general touching of genital parts with any part of the body.                                        |
| <b>Social play</b>         | Two or more dolphins interact playing. This behaviour can be vigorous with one dolphin chasing another or both spinning around each other quickly. Alternatively, play can be calmer with the dolphins circling gently around each other, or pushing one another. Individuals took turns as a chaser in chasing and/or mouth-biting. |
| <b>Solitary play</b>       | Playing alone, potentially with objects                                                                                                                                                                                                                                                                                              |

---

(such as a ball, pool float) or water. This can involve pushing, tossing, carrying or biting an object, as well as catching or manipulating water jets.

---

**Other**

Non-social activities consisting of general movements/stationary behaviors. One dolphin swim alone within at least more than one body-length from the nearest conspecific, without showing any synchronous movements. Also characterized by exploration above water or lying at the bottom of the pool.

---

**Table S2** Overview of the Output of the binomial GLM model composed by: “Emission” (Presence, Absence of vocalization) as a response variable, interaction between “Vocal category” (coded with the seven possible vocal categories obtained in this study: Burst pulses, BP; Click trains, Cl; Whistles, Wh; Burst pulse-Click trains, BP-Cl; Burst pulse-Whistles, BP-Wh; Click trains-Whistles, Cl-Wh; Burst pulse-Click trains-Whistles, BP-Cl-Wh) and “Context” (coded according to the six categories of behavioural contexts observed: Affiliative; Agonistic; Sexual; Social play; Solitary play; Other) as fixed variable, as well as “Vocal category” and “Context” without interaction as fixed variables. The significant p-values are showed in bold. AIC of the GLM= 2615; df= 3359.

| Coefficient | Estimate | S<br>E | S<br>tatistic | p-<br>value |
|-------------|----------|--------|---------------|-------------|
| (Intercept) | -2.418   | 0.348  | -6.951        | < 0.001     |
| BP-Cl       | 0.000    | 0.492  | 0.000         | 1.000       |
| BP-Cl-Wh    | -0.435   | 0.545  | -0.797        | 0.425       |
| BP-Wh       | -1.156   | 0.681  | -1.698        | 0.089       |
| Cl          | 1.779    | 0.402  | 4.430         | < 0.001     |

|                    |         |        |       |            |
|--------------------|---------|--------|-------|------------|
| CI-Wh              | 0.974   | 0      | 2     | <b>0.</b>  |
|                    |         | .424   | .296  | <b>022</b> |
| Wh                 | 1.142   | 0      | 2     | <b>0.</b>  |
|                    |         | .418   | .734  | <b>006</b> |
| Agonistic          | 1.214   | 0      | 2     | <b>0.</b>  |
|                    |         | .581   | .089  | <b>037</b> |
| Other              | 0.425   | 0      | 0     | 0.         |
|                    |         | .707   | .602  | 547        |
| Sexual             | -0.840  | 0      | -     | 0.         |
|                    |         | .617   | 1.362 | 173        |
| Social-play        | 0.797   | 0      | 1     | 0.         |
|                    |         | .433   | .841  | 066        |
| Solitary-play      | 0.403   | 0      | 0     | 0.         |
|                    |         | .464   | .868  | 385        |
| BP-CI:Agonistic    | -15.362 | 4      | -     | 0.         |
|                    |         | 70.590 | 0.033 | 974        |
| BP-CI-Wh:Agonistic | -0.066  | 0      | -     | 0.         |
|                    |         | .900   | 0.073 | 941        |
| BP-Wh:Agonistic    | 0.925   | 0      | 0     | 0.         |
|                    |         | .963   | .960  | 337        |
| CI:Agonistic       | -2.612  | 0      | -     | <b>0.</b>  |
|                    |         | .869   | 3.006 | <b>003</b> |
| CI-Wh:Agonistic    | -2.989  | 1      | -     | <b>0.</b>  |
|                    |         | .199   | 2.494 | <b>013</b> |
| Wh:Agonistic       | -0.936  | 0      | -     | 0.         |

|                 |         |        |       |            |
|-----------------|---------|--------|-------|------------|
|                 |         | .766   | 1.222 | 222        |
| BP-CI:Other     | -14.574 | 4      | -     | 0.         |
|                 |         | 79.910 | 0.030 | 976        |
| BP-CI-Wh:Other  | -14.139 | 4      | -     | 0.         |
|                 |         | 79.910 | 0.029 | 976        |
| BP-Wh:Other     | -0.029  | 1      | -     | 0.         |
|                 |         | .373   | 0.021 | 983        |
| CI:Other        | -0.731  | 0      | -     | 0.         |
|                 |         | .859   | 0.851 | 395        |
| CI-Wh:Other     | -1.424  | 1      | -     | 0.         |
|                 |         | .050   | 1.356 | 175        |
| Wh:Other        | 0.771   | 0      | 0     | 0.         |
|                 |         | .845   | .913  | 361        |
| BP-CI:Sexual    | 0.976   | 0      | 1     | 0.         |
|                 |         | .782   | .247  | 212        |
| BP-CI-Wh:Sexual | 2.643   | 0      | 3     | <b>0.</b>  |
|                 |         | .778   | .398  | <b>001</b> |
| BP-Wh:Sexual    | 2.665   | 0      | 2     | <b>0.</b>  |
|                 |         | .893   | .986  | <b>003</b> |
| CI:Sexual       | -0.698  | 0      | -     | 0.         |
|                 |         | .723   | 0.965 | 334        |
| CI-Wh:Sexual    | -0.114  | 0      | -     | 0.         |
|                 |         | .749   | 0.152 | 879        |
| Wh:Sexual       | 1.114   | 0      | 1     | 0.         |
|                 |         | .694   | .607  | 108        |

|                        |        |      |       |            |
|------------------------|--------|------|-------|------------|
| BP-CI:Social-play      | -0.294 | 0    | -     | 0.         |
|                        |        | .625 | 0.471 | 638        |
| BP-CI-Wh:Social-play   | -0.237 | 0    | -     | 0.         |
|                        |        | .688 | 0.345 | 730        |
| BP-Wh:Social-play      | 0.777  | 0    | 0     | 0.         |
|                        |        | .786 | .989  | 323        |
| CI:Social-play         | -1.714 | 0    | -     | <b>0.</b>  |
|                        |        | .540 | 3.174 | <b>002</b> |
| CI-Wh:Social-play      | -1.540 | 0    | -     | <b>0.</b>  |
|                        |        | .590 | 2.613 | <b>009</b> |
| Wh:Social-play         | -0.733 | 0    | -     | 0.         |
|                        |        | .541 | 1.355 | 175        |
| BP-CI:Solitary-play    | 0.177  | 0    | 0     | 0.         |
|                        |        | .648 | .273  | 785        |
| BP-CI-Wh:Solitary-play | 0.909  | 0    | 1     | 0.         |
|                        |        | .678 | .342  | 180        |
| BP-Wh:Solitary-play    | 1.993  | 0    | 2     | <b>0.</b>  |
|                        |        | .783 | .546  | <b>011</b> |
| CI:Solitary-play       | -0.786 | 0    | -     | 0.         |
|                        |        | .553 | 1.420 | 156        |
| CI-Wh:Solitary-play    | -2.871 | 0    | -     | <b>0.</b>  |
|                        |        | .886 | 3.242 | <b>001</b> |
| Wh:Solitary-play       | -2.092 | 0    | -     | <b>0.</b>  |
|                        |        | .692 | 3.022 | <b>003</b> |

---



---



---

**Anova on the GLM**

---

| <b>Coefficients</b>    | <b>Statistic</b> | <b>d</b><br><b>f</b> | <b><i>p-value</i></b> |
|------------------------|------------------|----------------------|-----------------------|
| Vocal category         | 68.40            | 6                    | <b>&lt;0.001</b>      |
| Context                | 14.78            | 5                    | <b>0.011</b>          |
| Vocal category:Context | 162.98           | 3<br>0               | <b>&lt;0.001</b>      |

---
